# Supplementary material for: Metabolome and Whole-Transcriptome Analyses Reveal the Molecular Mechanisms Underlying Hypoglycemic Nutrient Metabolites Biosynthesis in Cyclocarya paliurus Leaves During Different Harvest Stages
Source: PubMed Central journal article supplement (PMC8919051; doi:10.3389/fnut.2022.851569), 2022-02-28

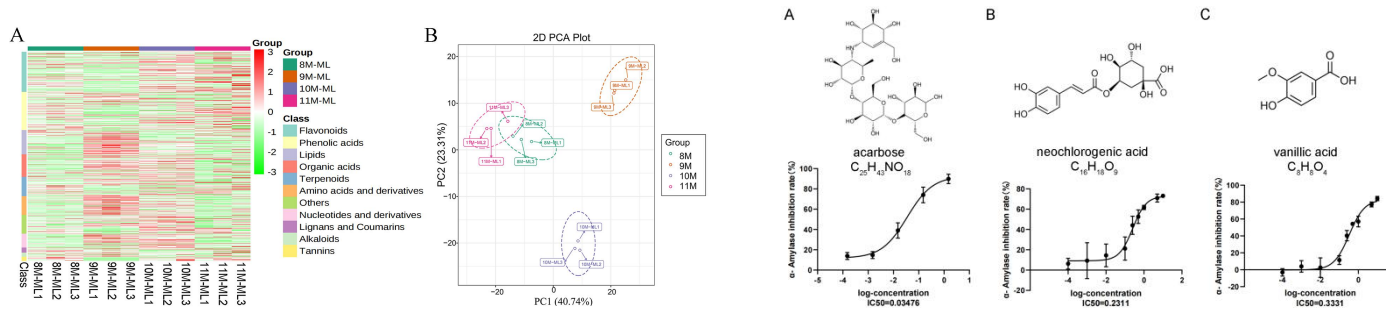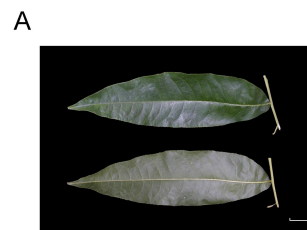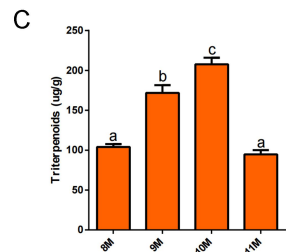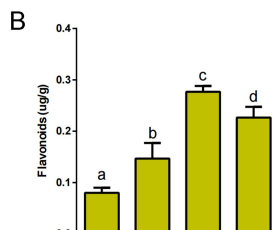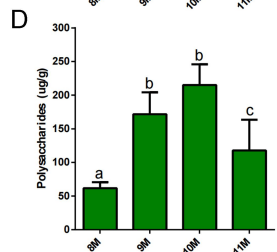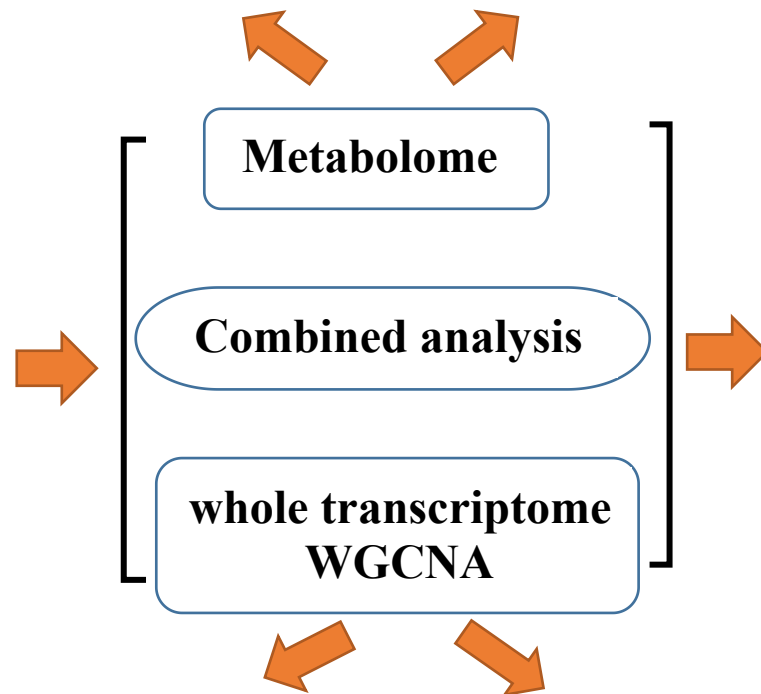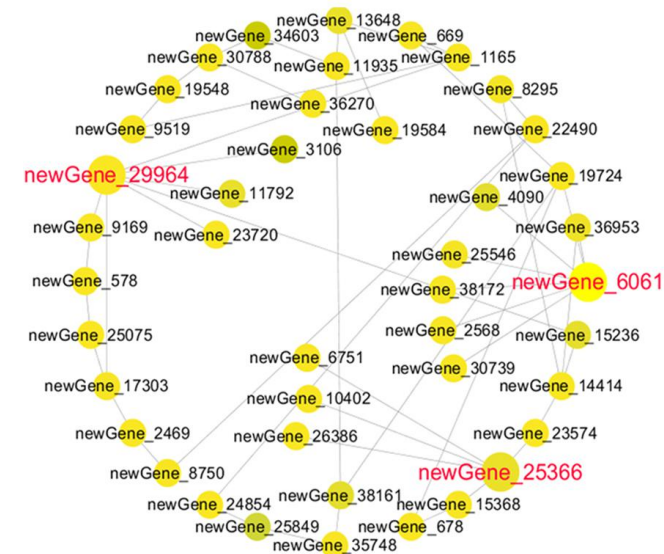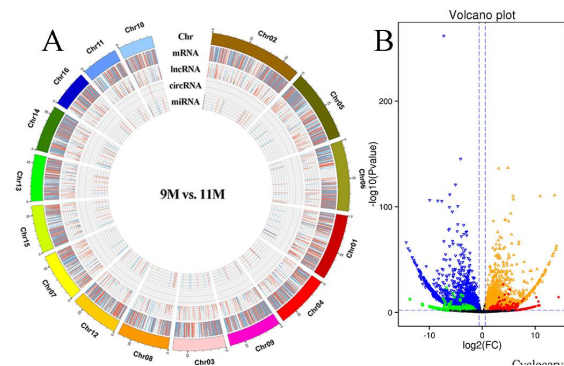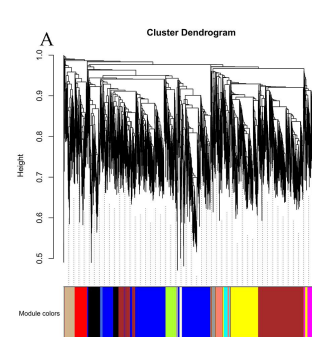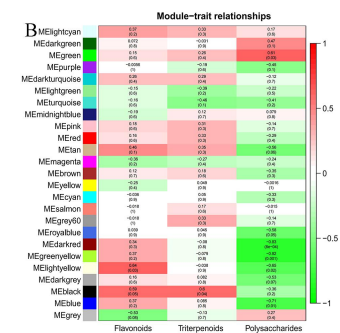

Supplement: Image_1.pdf [file Image_1.pdf]
